# Supplementary material for: Facile synthesis of Cu/Ni alloy nanospheres with tunable size and elemental ratio
Source: Royal Society of Chemistry journal article supplement (doi:10.1039/c7ra06062a), 2017-01-01
Supplement: c7ra06062a1.pdf [file c7ra06062a1.pdf]

**Supporting Information for**

# **Facile synthesis of Cu/Ni alloy nanospheres with tunable size and elemental ratio**

Jinglei Liu, Yiqun Zheng,\* Shifeng Hou

National Engineering Research Center for Colloidal Materials

Shandong University

Jinan, Shandong 272000, P. R. China

\*Corresponding author: Prof. Y. Zheng, E-mail: [yiqunzheng@sdu.edu.cn](mailto:yiqunzheng@sdu.edu.cn)

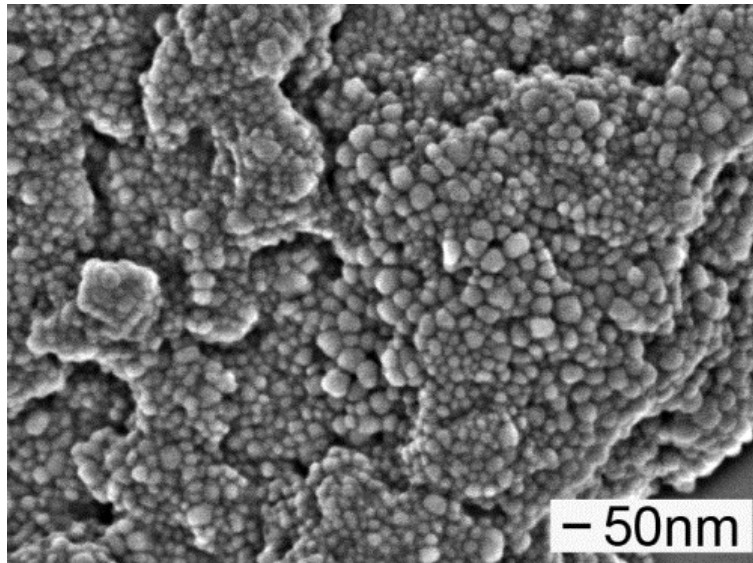

**Figure S1.** SEM images of Cu/Ni alloy nanospheres obtained using the standard procedure, except that TOP was absent

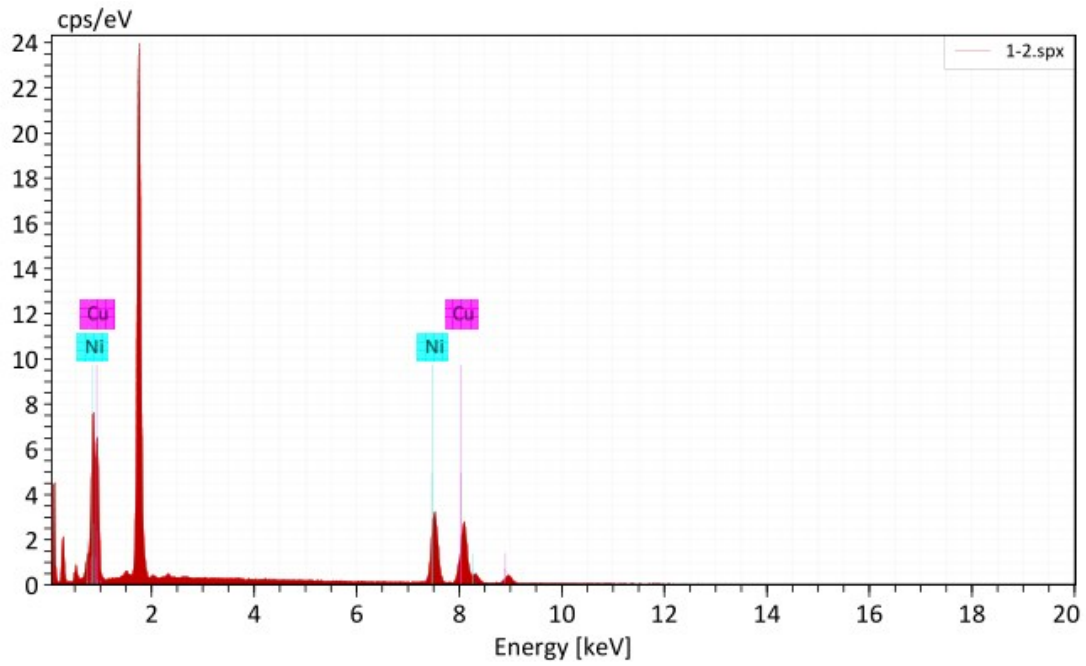

| Element    | At. No. | Netto | Mass [%]     | Mass Norm. [%] | Atom [%]      | abs. error [%]<br>(1 sigma) | rel. error [%]<br>(1 sigma) |
|------------|---------|-------|--------------|----------------|---------------|-----------------------------|-----------------------------|
| Nickel     | 28      | 15836 | 26.41        | 48.00          | 49.99         | 0.77                        | 2.90                        |
| Copper     | 29      | 13366 | 28.61        | 52.00          | 50.01         | 0.84                        | 2.93                        |
| <b>Sum</b> |         |       | <b>55.02</b> | <b>100.00</b>  | <b>100.00</b> |                             |                             |

**Figure S2.** EDS pattern of Cu<sub>50</sub>Ni<sub>50</sub> nanospheres with the diameter of 16.5±1.7 nm.

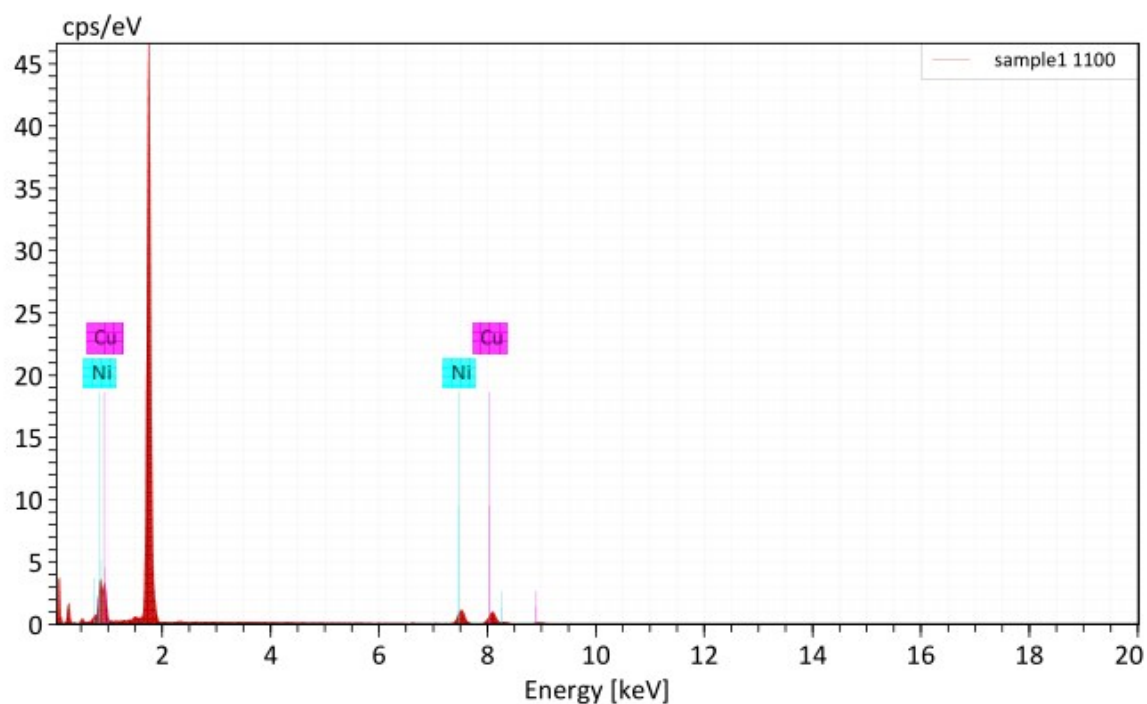

| Element | At. No. | Netto      | Mass [%]     | Mass Norm. [%] | Atom [%]      | abs. error [%]<br>(1 sigma) | rel. error [%]<br>(1 sigma) |
|---------|---------|------------|--------------|----------------|---------------|-----------------------------|-----------------------------|
| Nickel  | 28      | 5467       | 13.48        | 47.75          | 49.73         | 0.44                        | 3.25                        |
| Copper  | 29      | 4622       | 14.75        | 52.25          | 50.27         | 0.49                        | 3.32                        |
|         |         | <b>Sum</b> | <b>28.23</b> | <b>100.00</b>  | <b>100.00</b> |                             |                             |

**Figure S3.** EDS pattern of Cu<sub>50</sub>Ni<sub>50</sub> nanospheres with the diameter of 6.9±1.9 nm.

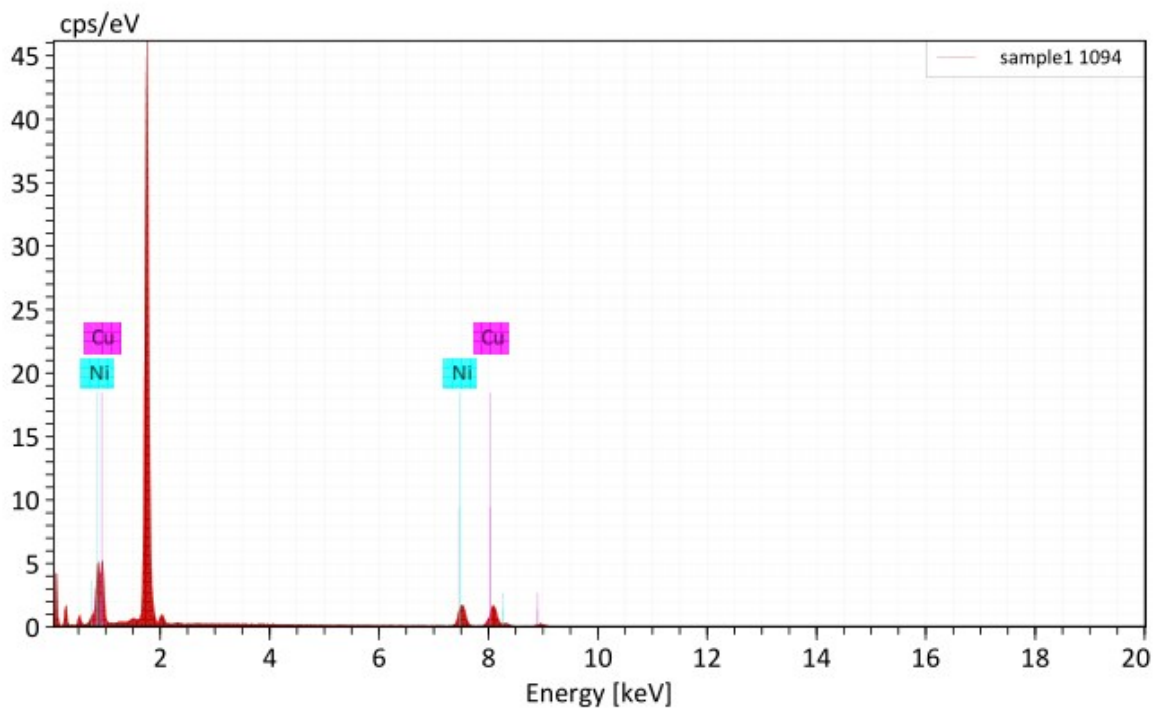

| Element    | At. No. | Netto | Mass [%]     | Mass Norm. [%] | Atom [%]      | abs. error [%] (1 sigma) | rel. error [%] (1 sigma) |
|------------|---------|-------|--------------|----------------|---------------|--------------------------|--------------------------|
| Nickel     | 28      | 7651  | 17.84        | 45.19          | 47.16         | 0.55                     | 3.09                     |
| Copper     | 29      | 7127  | 21.64        | 54.81          | 52.84         | 0.67                     | 3.11                     |
| <b>Sum</b> |         |       | <b>39.48</b> | <b>100.00</b>  | <b>100.00</b> |                          |                          |

**Figure S4.** EDS pattern of Cu<sub>50</sub>Ni<sub>50</sub> nanospheres with the diameter of 22.9±2.2 nm.

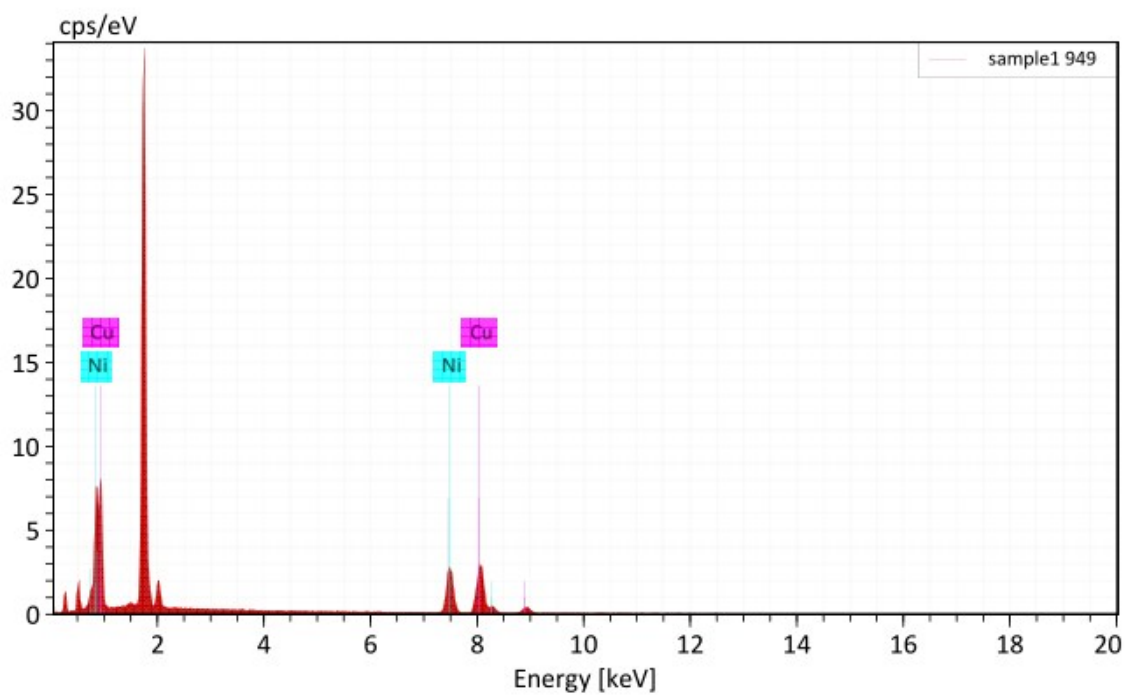

| Element    | At. No. | Netto | Mass [%]     | Mass Norm. [%] | Atom [%]      | abs. error [%] (1 sigma) | rel. error [%] (1 sigma) |
|------------|---------|-------|--------------|----------------|---------------|--------------------------|--------------------------|
| Nickel     | 28      | 29209 | 40.78        | 47.19          | 49.18         | 1.14                     | 2.79                     |
| Copper     | 29      | 25355 | 45.62        | 52.81          | 50.82         | 1.29                     | 2.82                     |
| <b>Sum</b> |         |       | <b>86.40</b> | <b>100.00</b>  | <b>100.00</b> |                          |                          |

**Figure S5.** EDS pattern of Cu<sub>50</sub>Ni<sub>50</sub> nanospheres with the diameter of 27.3±2.7 nm.

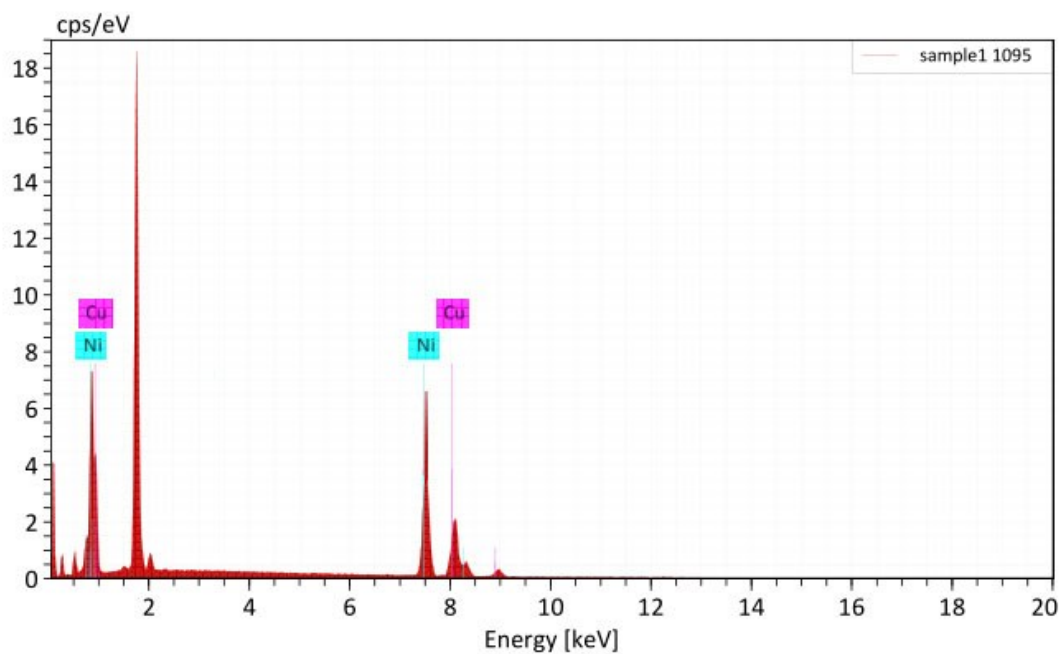

| Element    | At. No. | Netto | Mass [%]     | Mass Norm. [%] | Atom [%]      | abs. error [%] (1 sigma) | rel. error [%] (1 sigma) |
|------------|---------|-------|--------------|----------------|---------------|--------------------------|--------------------------|
| Nickel     | 28      | 21729 | 42.02        | 79.89          | 81.78         | 0.91                     | 2.84                     |
| Copper     | 29      | 11453 | 11.45        | 20.11          | 18.22         | 0.64                     | 2.99                     |
| <b>Sum</b> |         |       | <b>53.47</b> | <b>100.00</b>  | <b>100.00</b> |                          |                          |

**Figure S6.** EDS pattern of  $\text{Cu}_{20}\text{Ni}_{80}$  nanospheres with the diameter of  $18.0 \pm 1.0$  nm.

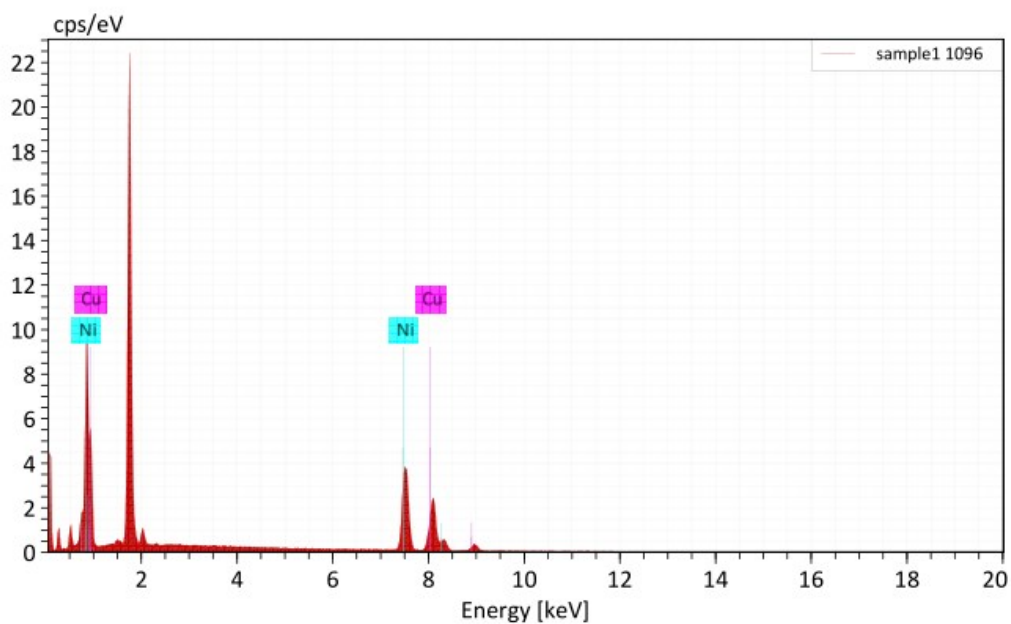

| Element    | At. No. | Netto | Mass [%]     | Mass Norm. [%] | Atom [%]      | abs. error [%] (1 sigma) | rel. error [%] (1 sigma) |
|------------|---------|-------|--------------|----------------|---------------|--------------------------|--------------------------|
| Nickel     | 28      | 20230 | 38.32        | 68.42          | 66.33         | 0.98                     | 2.84                     |
| Copper     | 29      | 11483 | 20.43        | 31.58          | 33.67         | 0.73                     | 2.98                     |
| <b>Sum</b> |         |       | <b>58.76</b> | <b>100.00</b>  | <b>100.00</b> |                          |                          |

**Figure S7.** EDS pattern of  $\text{Cu}_{33}\text{Ni}_{67}$  nanospheres with the diameter of  $16.3 \pm 0.6$  nm.



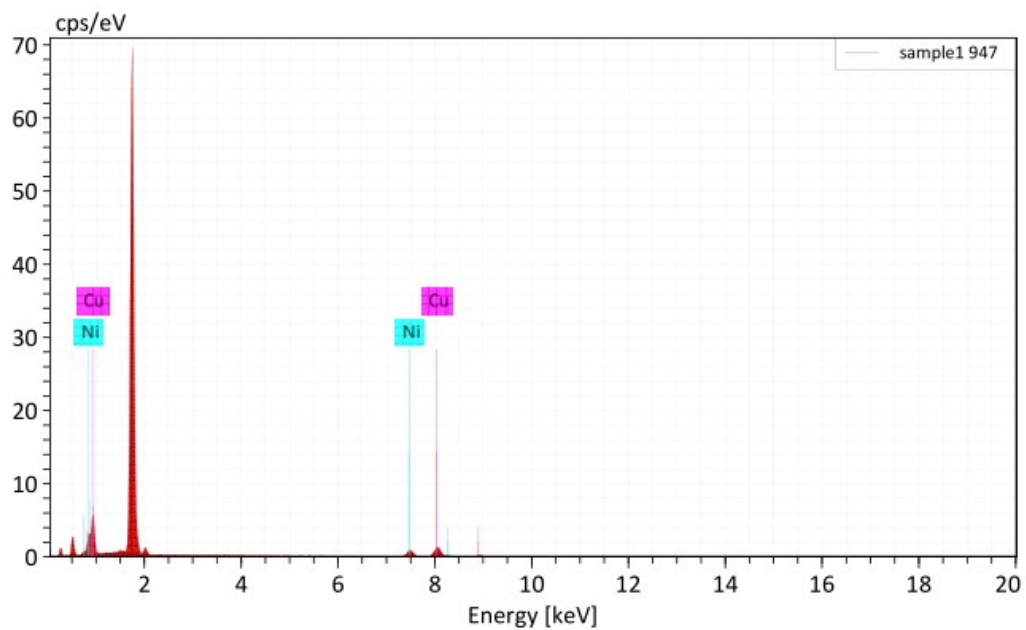

| Element    | At. No. | Netto | Mass [%]     | Mass Norm. [%] | Atom [%]      | abs. error [%] (1 sigma) | rel. error [%] (1 sigma) |
|------------|---------|-------|--------------|----------------|---------------|--------------------------|--------------------------|
| Nickel     | 28      | 3664  | 11.38        | 33.32          | 35.11         | 0.39                     | 3.46                     |
| Copper     | 29      | 5644  | 22.78        | 66.68          | 64.89         | 0.72                     | 3.18                     |
| <b>Sum</b> |         |       | <b>34.16</b> | <b>100.00</b>  | <b>100.00</b> |                          |                          |

**Figure S8.** EDS pattern of  $\text{Cu}_{67}\text{Ni}_{33}$  nanospheres with the diameter of  $19.7 \pm 1.5$  nm.

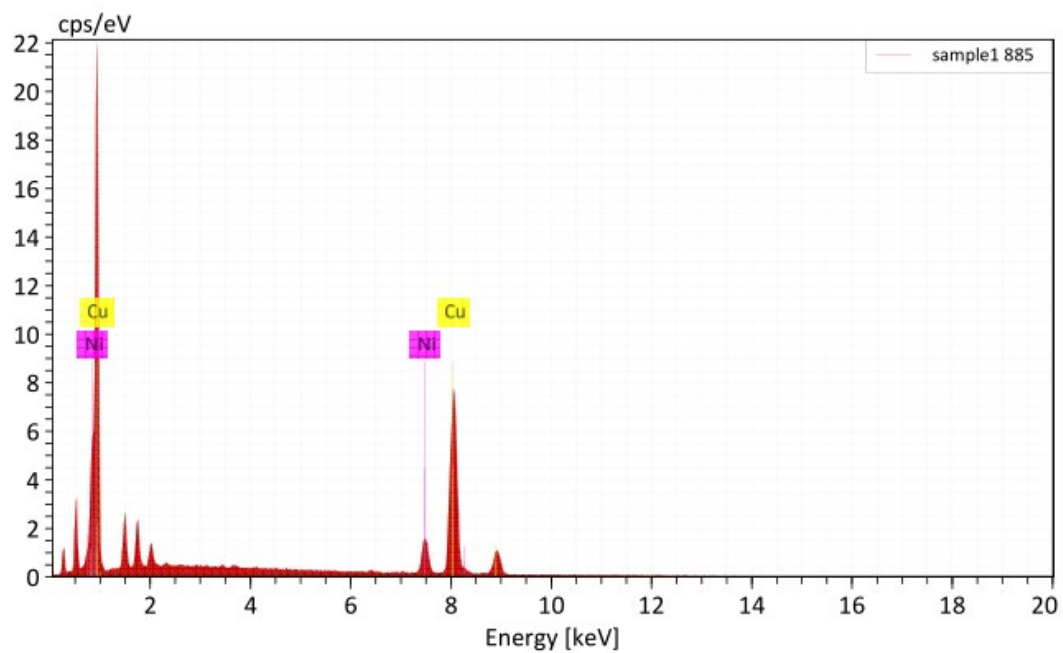

| Element    | At. No. | Netto | Mass [%]     | Mass Norm. [%] | Atom [%]      | abs. error [%]<br>(1 sigma) | rel. error [%]<br>(1 sigma) |
|------------|---------|-------|--------------|----------------|---------------|-----------------------------|-----------------------------|
| Nickel     | 28      | 8414  | 13.06        | 18.99          | 19.85         | 0.32                        | 3.18                        |
| Copper     | 29      | 44730 | 70.83        | 81.01          | 80.15         | 2.03                        | 2.76                        |
| <b>Sum</b> |         |       | <b>83.88</b> | <b>100.00</b>  | <b>100.00</b> |                             |                             |

**Figure S9.** EDS pattern of Cu<sub>80</sub>Ni<sub>20</sub> nanospheres with the diameter of 19.7±1.2 nm.

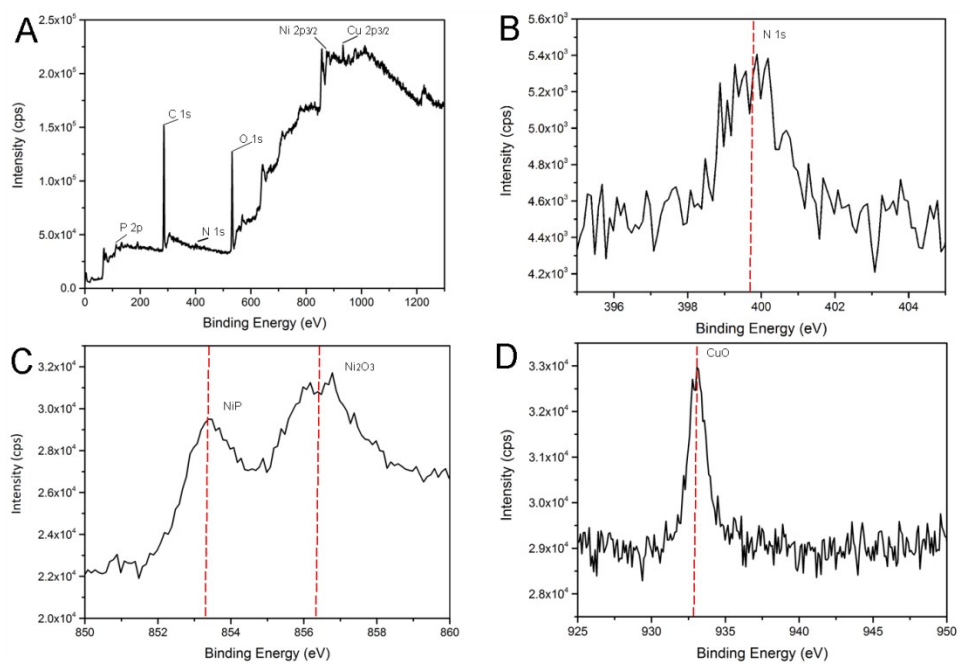

**Figure S10.** XPS analysis of CuNi (1). (A) survey scan; (B) N 1s spectrum; (C) Ni 2p<sub>3/2</sub> spectrum; (D) Cu 2p<sub>3/2</sub> spectrum.

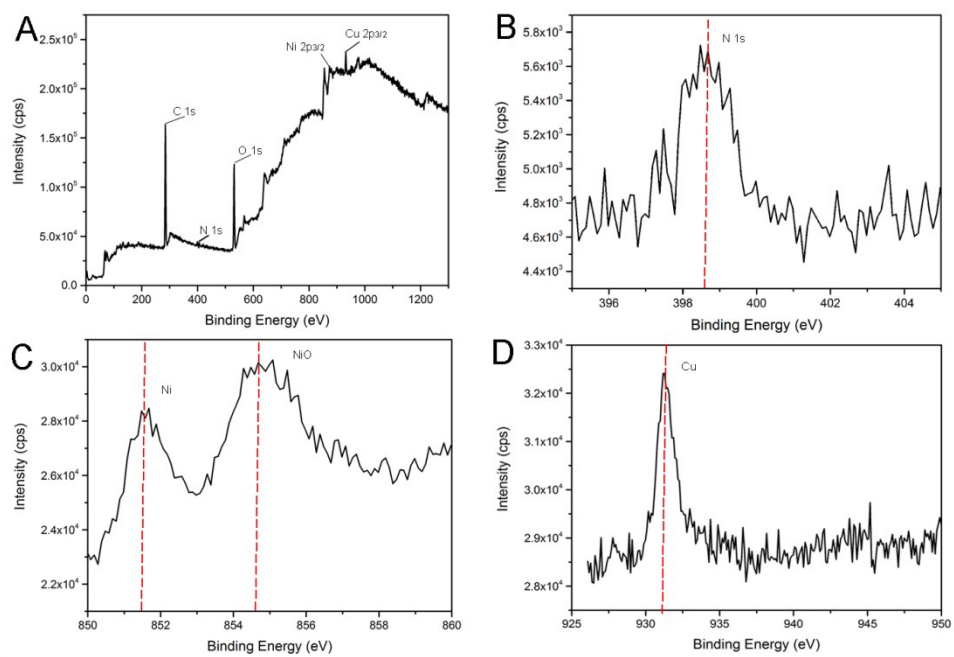

**Figure S11.** XPS analysis of CuNi (8). (A)survey scan; (B) N 1s spectrum; (C) Ni 2p<sub>3/2</sub> spectrum o; (D) Cu 2p<sub>3/2</sub> spectrum.

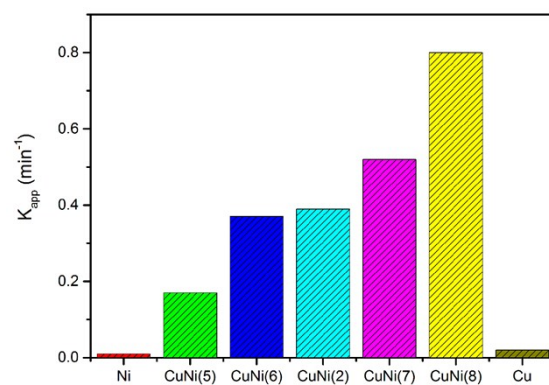

**Figure S12.** Comparison of apparent reaction rates for reduction of 4-NP when Cu/Ni nanospheres with different elemental compositions were used as catalysts. The  $k_{app}$  value of pure Cu catalyst is  $0.03 \text{ min}^{-1}$ . The  $k_{app}$  value of pure Ni catalyst is  $0.01 \text{ min}^{-1}$ .

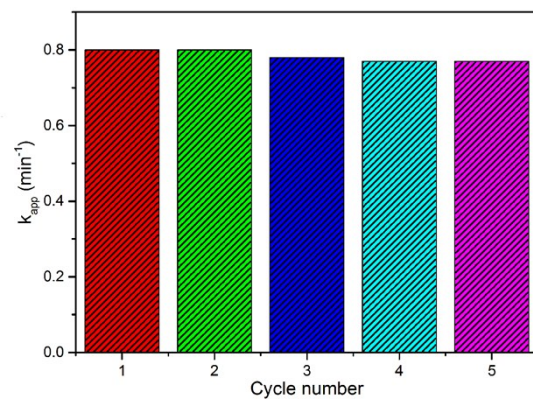

**Figure S13.** The catalytic performance within five cycles for the reduction of 4-NP catalyzed by CuNi (8).

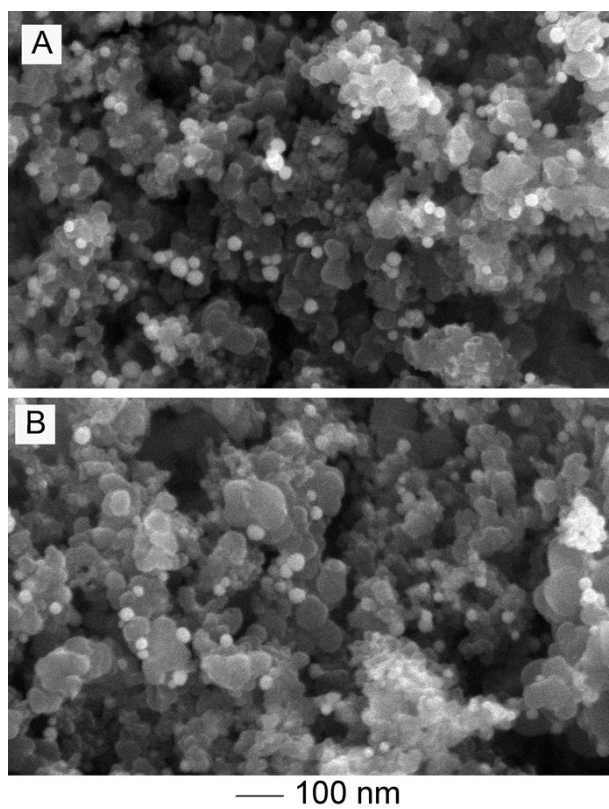

**Figure S14.** The SEM images of CuNi (8). (A) before five cycle of catalytic reactions; (B) after five cycle of catalytic reactions.

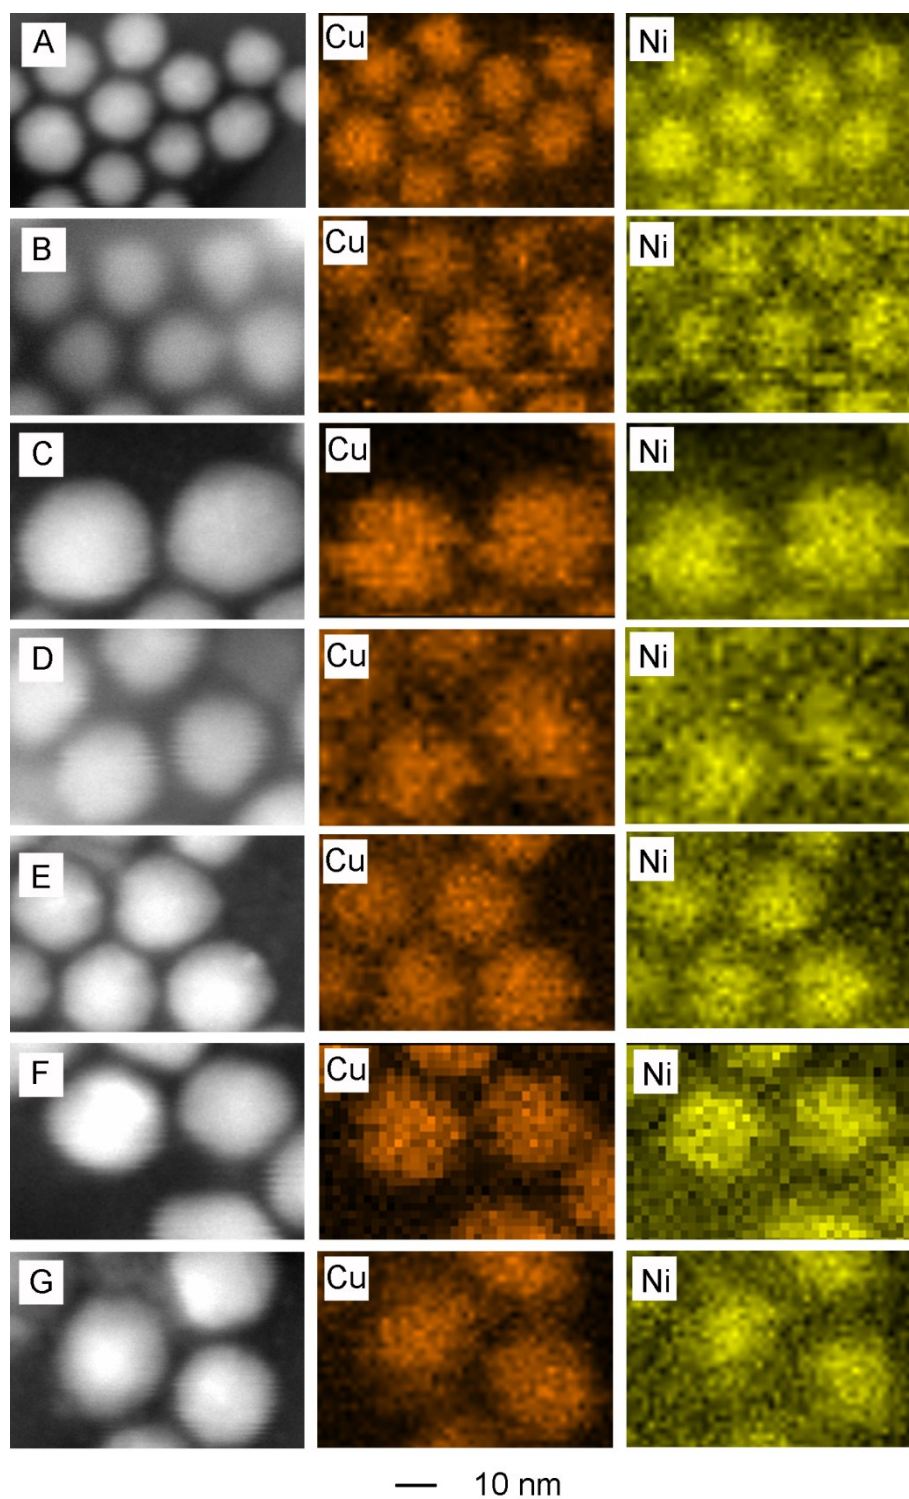

**Figure S15.** HAADF-STEM and STEM-EDS elemental mapping images of Cu/Ni alloy nanospheres: (A) CuNi (1); (B) CuNi (3); (C) CuNi (4); (D) CuNi (5); (E) CuNi (6); (F) CuNi (7); (G) CuNi (8).



**Table S1.** AAS analyses of Cu/Ni alloy nanospheres with different sizes and elemental ratios (50% mass loading of total metal) as catalysts before the 4-NP reduction reaction.

|          | Cu (mg/mL) | Ni (mg/mL) | Cu/Ni nanospheres (mg/mL) |
|----------|------------|------------|---------------------------|
| CuNi (1) | 1.265      | 1.177      | 2.442                     |
| CuNi (2) | 1.115      | 1.124      | 2.239                     |
| CuNi (3) | 1.133      | 1.125      | 2.258                     |
| CuNi (4) | 1.175      | 1.031      | 2.206                     |
| CuNi (5) | 0.361      | 1.344      | 1.705                     |
| CuNi (6) | 0.490      | 1.126      | 1.616                     |
| CuNi (7) | 1.222      | 0.594      | 1.816                     |
| CuNi (8) | 1.527      | 0.380      | 1.907                     |

**Table S2.** The catalytic performances of alloy nanoparticles to 4-NP in other literatures.

| Catalyst | Mass ratio of catalyst to 4-NP | $K_{app}$ ( $\text{min}^{-1}$ ) | Ref.       |
|----------|--------------------------------|---------------------------------|------------|
| Pt-Ni    | 1:1                            | 0.37                            | 54         |
| Cu-Ag    | 5:2                            | 0.42                            | 55         |
| Cu-Ni    | 50:7                           | 0.89                            | 56         |
| Cu-Ni    | 1:2.8                          | 0.8                             | This study |
